# Supplementary figures and images for: Temperature-Dependent Absorption of Ternary HfS2−xSex 2D Layered Semiconductors
Source: MDPI journal article supplement (doi:10.3390/ma15186304), 2022-09-11

**Figure S1.** Temperature-dependent absorption spectra of  $\text{HfS}_{2-x}\text{Se}_x$  (a–f).

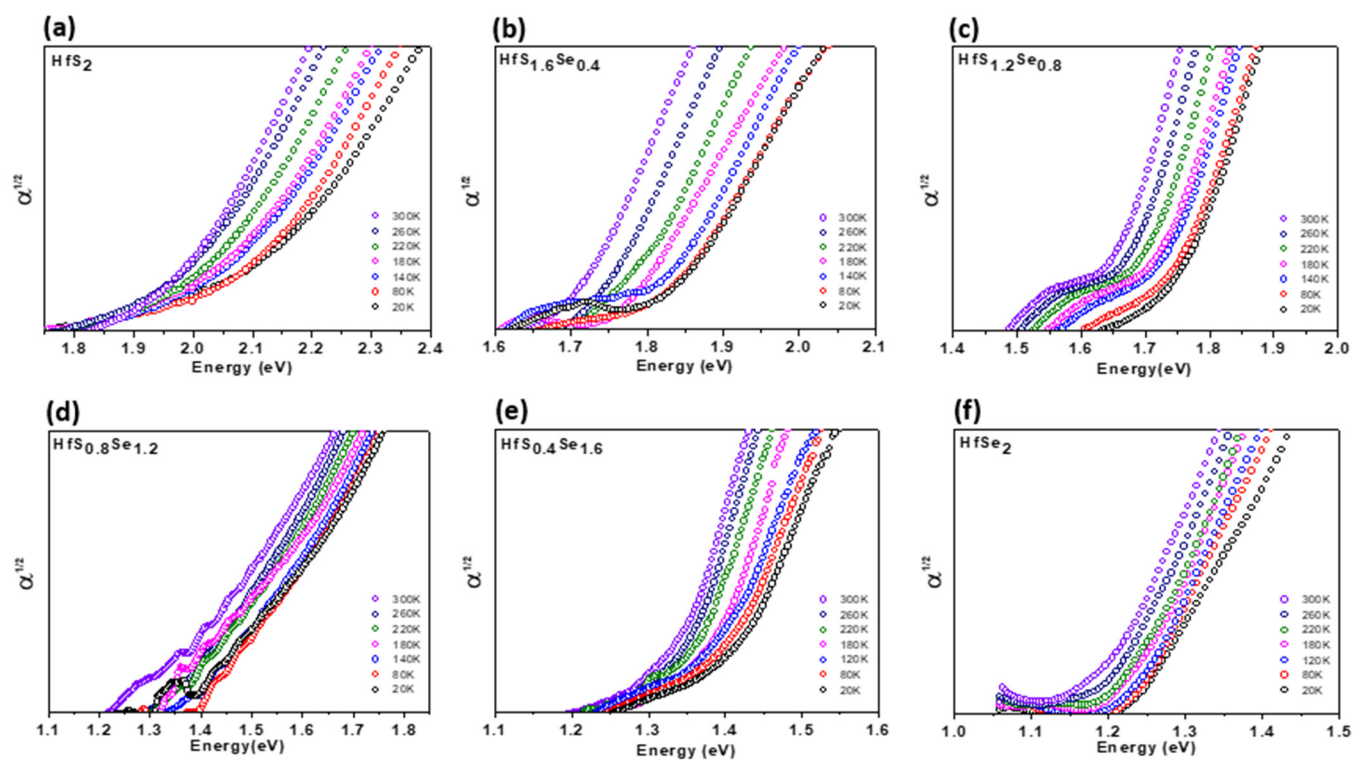

Supplement: s1 [file s1]
